# Supplementary material for: Characterizing human lung tissue microbiota and its relationship to epidemiological and clinical features
Source: Springer Nature journal article supplement (doi:10.1186/s13059-016-1021-1), 2016-07-28

**Additional file 2**

**Figure S1.** Map showing number of subjects from the five residential areas in Lombardia, Italy, where study subjects resided (denoted with star).

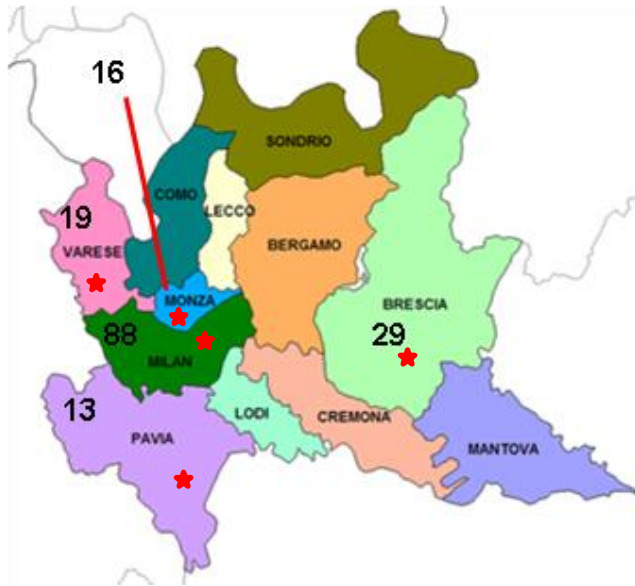

**Figure S2.** Relative abundance of *Thermi* in HMP phase 1 samples (n=2744). Each circle represents a unique sample or overlapping samples at the same relative abundance. Most samples have no or extreme low relative abundance of *Thermi*.

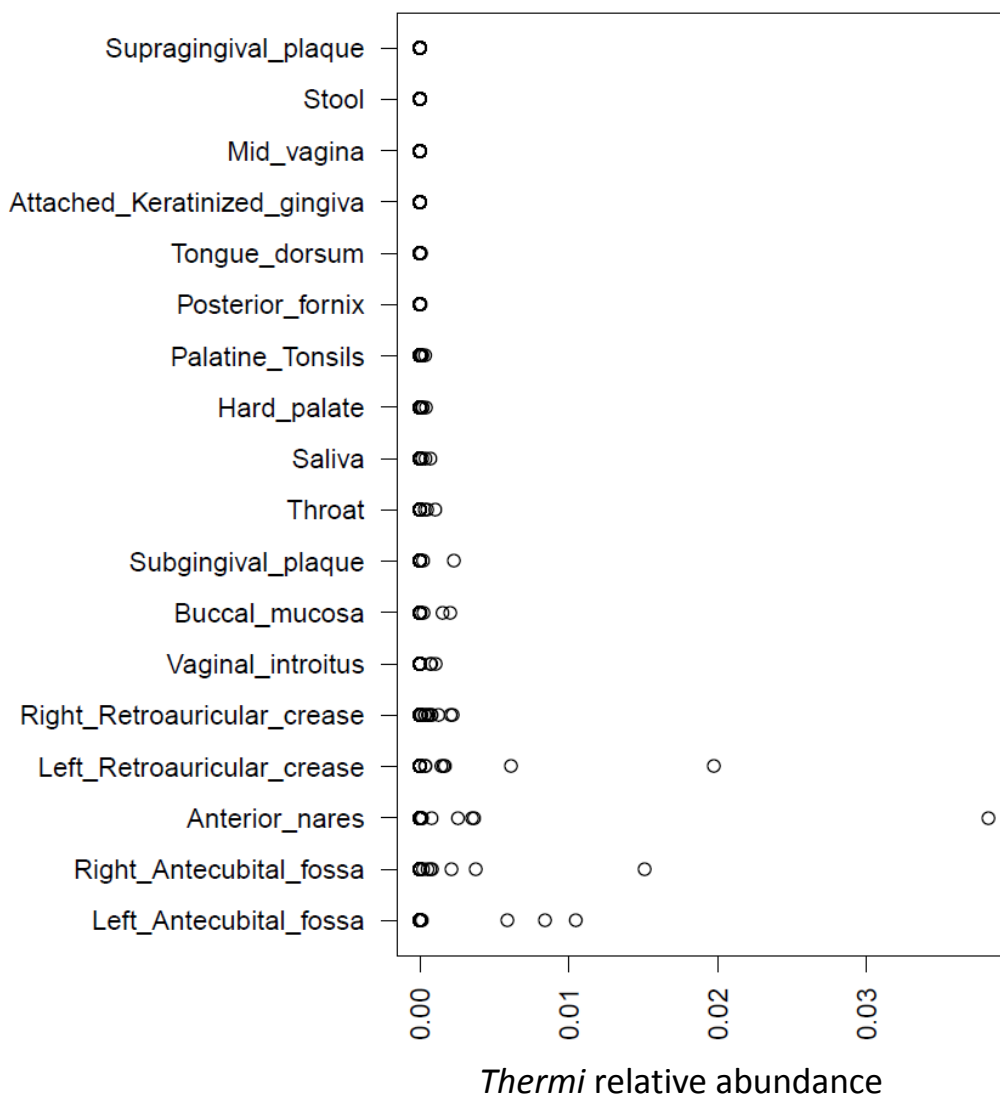

**Figure S3.** Heatmap of Spearman correlation between phylum-level taxonomic and module-level functional profiles among non-malignant lung tissue samples. Only the top and phylum and modules were shown.

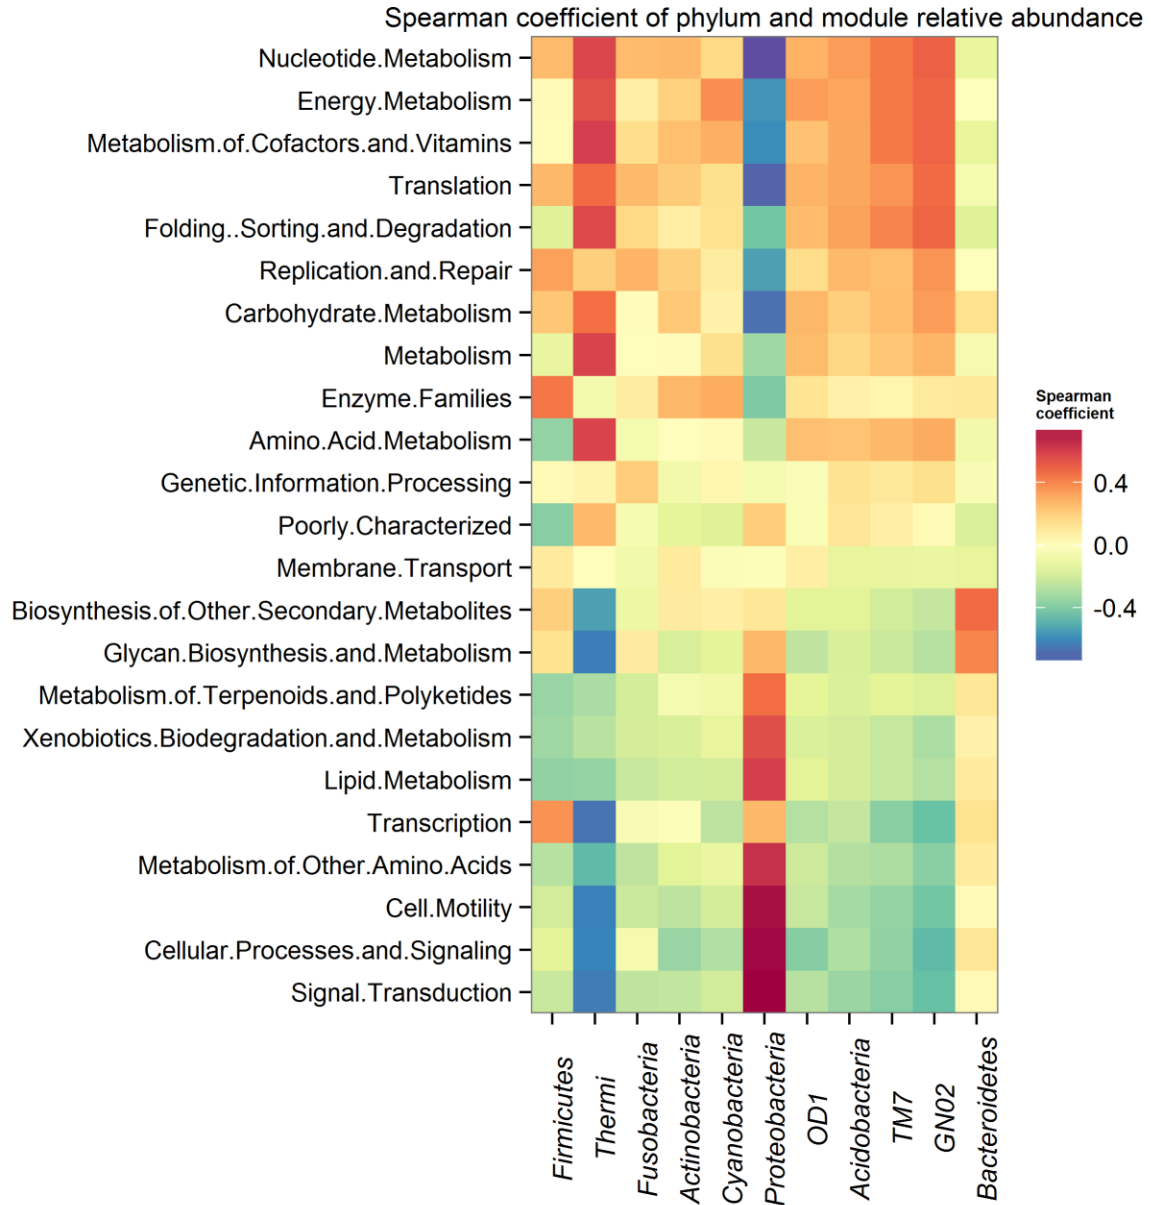

**Figure S4.** Heatmap showing KEGG modules (marked with star) and pathways that significantly differed in relative abundance by patients' tumor stage (Bonferroni-corrected,  $P < 0.05$  according to both Kruskal Wallis test and linear regression model adjusted for history of bronchitis and residential areas (stage IV is the reference)). Row-z scores are the module/pathway relative abundance subtracted from the mean among samples and divided by the standard deviation.

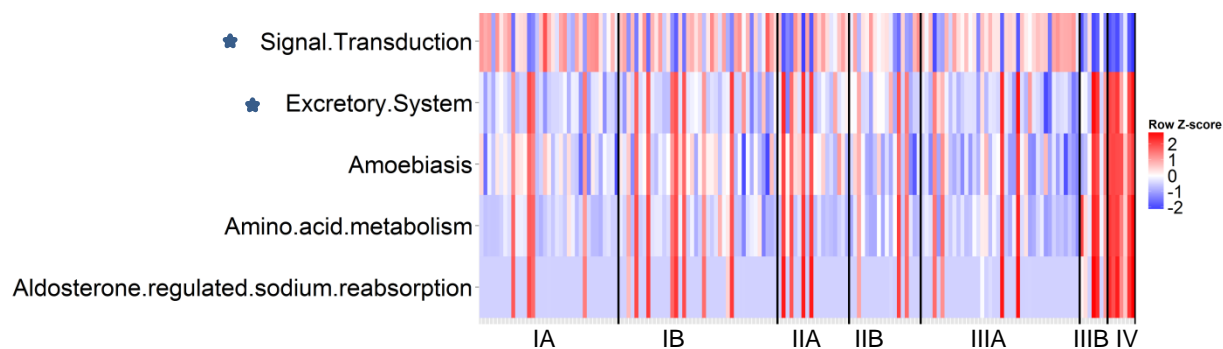

**Figure S5.** Comparison of mean between- and within-subjects Weighted UniFrac distance.

UniFrac distance between-subject in non-malignant tissues (N), tumor tissues (T) and UniFrac distance between paired N and T tissues within-subject (NT) were compared. There is significantly lower mean distance within- than between-subjects; but, no significant difference of mean between-subjects distance comparing non-malignant vs. tumor samples.

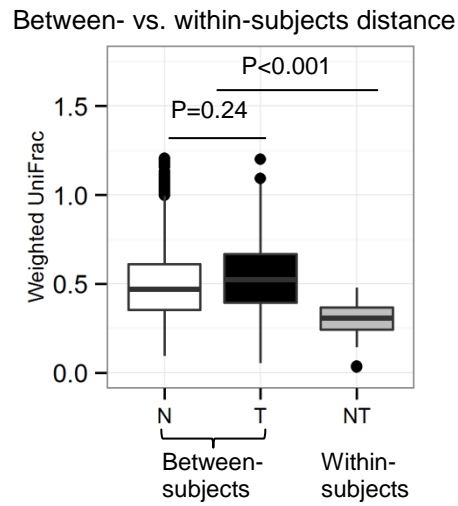

Supplement: 13059_2016_1021_MOESM2_ESM.pdf [file 13059_2016_1021_MOESM2_ESM.pdf]
